# Supplementary material
Source: HighWire-hosted journal article supplement (http://d2538ggaoe6cji.cloudfront.net/highwire/filestream/45206/field_highwire_adjunct_files/0/152074-1.pdf)

## SUPPLEMENTARY DATA

**SupplFig1. The HZ is present from late larval development to adulthood.** (A) The L3 HZ and (B) adult HZ is also *Pdm1+*. (C) *wg* and *byn* expression is tightly correlated in the P1 HZ. (D) Many *wg+* cells are also *Myo1a+* in the P1 HZ. (E) *wg* and *byn* expression is tightly correlated in the P3 HZ. (F) A few *wg+* cells are also *Myo1a+* in the P3 HZ. (G) No significant cell death is observed in 1d old animals, N=5. Genotypes and markers indicated in panels, yellow dotted lines indicate the HZ, scale=50 $\mu$ m.

**SupplFig2. Lineage tracing of the boundary region in development.** (A-B) No HS controls for the lineage tracing show either no label (A) or occasionally single cells are labeled (B). (C) Percentages of the types of clonal patterns observed. (D) Hybrid clones do not cross into the midgut. N=4 clones from 3 animals. Genotypes and markers indicated in panels, yellow dotted lines indicate the HZ, white dotted lines indicate clones, scale=50 $\mu$ m.

**SupplFig3. There is less proliferation near the adult HZ.** (A) Fewer BrdU<sup>+</sup> cells are observed within 30 $\mu$ m of the HZ. Data represent mean  $\pm$  SEM. (B) *Notch* stem cell tumors further from the HZ are larger. Data represent mean  $\pm$  SEM. (C) *Notch* stem cell tumors with >6 cells are infrequently found near the HZ. Data represent mean  $\pm$  SEM. (D) In WT animals *esg+* cells are found in singles or pairs. (E) After depletion of Notch, *esg+* stem cell tumors form. (F) ISCs near the HZ are DI<sup>+</sup> and (G) after injury, *esg+DI+* cells expand, scale=50 $\mu$ m and 10 $\mu$ m. Genotypes and markers indicated in panels, yellow dotted lines indicate the HZ, scale=50 $\mu$ m.

**SupplFig4. Injury to the adult HZ/hindgut leads to cell cycle re-entry and OB-ISC expansion.** (A) TUNEL is never observed around the HZ in the absence of injury. (B) After injury, TUNEL is observed in the HZ and hindgut, but never in the midgut or in OB-ISCs, scale for A-B=50 $\mu$ m. (C-D) The cell cycle response is localized to the most posterior part of the midgut, HZ, and hindgut after injury, scale=50 $\mu$ m. Genotypes and markers indicated in panels, yellow dotted lines indicate the HZ.

**SupplFig5. Injury to the adult HZ/hindgut drives midgut ISC division and HZ breakage. (A)**

Graphs showing *esg+* cell expansion by bins of 10 $\mu$ m after different recovery times. The expansion is primarily localized close to the HZ. Data represent mean  $\pm$  SEM. (B) A similar number of *esg-* cells are labeled in both control and injured animals. Data represent mean  $\pm$  SEM. (C) The size of *esg-* labeled clones are 1-2 cells in both control and injured animals. Data represent mean  $\pm$  SEM. (D) *esg+* divide both asymmetrically and symmetrically before and after injury. Data represents the % of clones that either *esg+* only or *esg+/-*. (E) After injury, breaks are observed in the HZ. Data represent mean  $\pm$  SEM. (F) Breaks in the HZ vary in length. Data represent mean  $\pm$  SEM. (G) In injured animals with more breaks, more *esg+* cells are found posterior to the HZ. Data represent mean  $\pm$  SEM.

**SupplFig6. *upd3* is sufficient to drive cell cycling. (A)** Few BrdU+ cells are observed in control animals. (B) After ectopic *upd3* expression using *bynGal4* (drives in the HZ/hindgut), BrdU+ cells are found in the hindgut, HZ, and midgut. Genotypes and markers indicated in panels, yellow dotted lines indicate the HZ, scale=50 $\mu$ m.

# SupplFig1

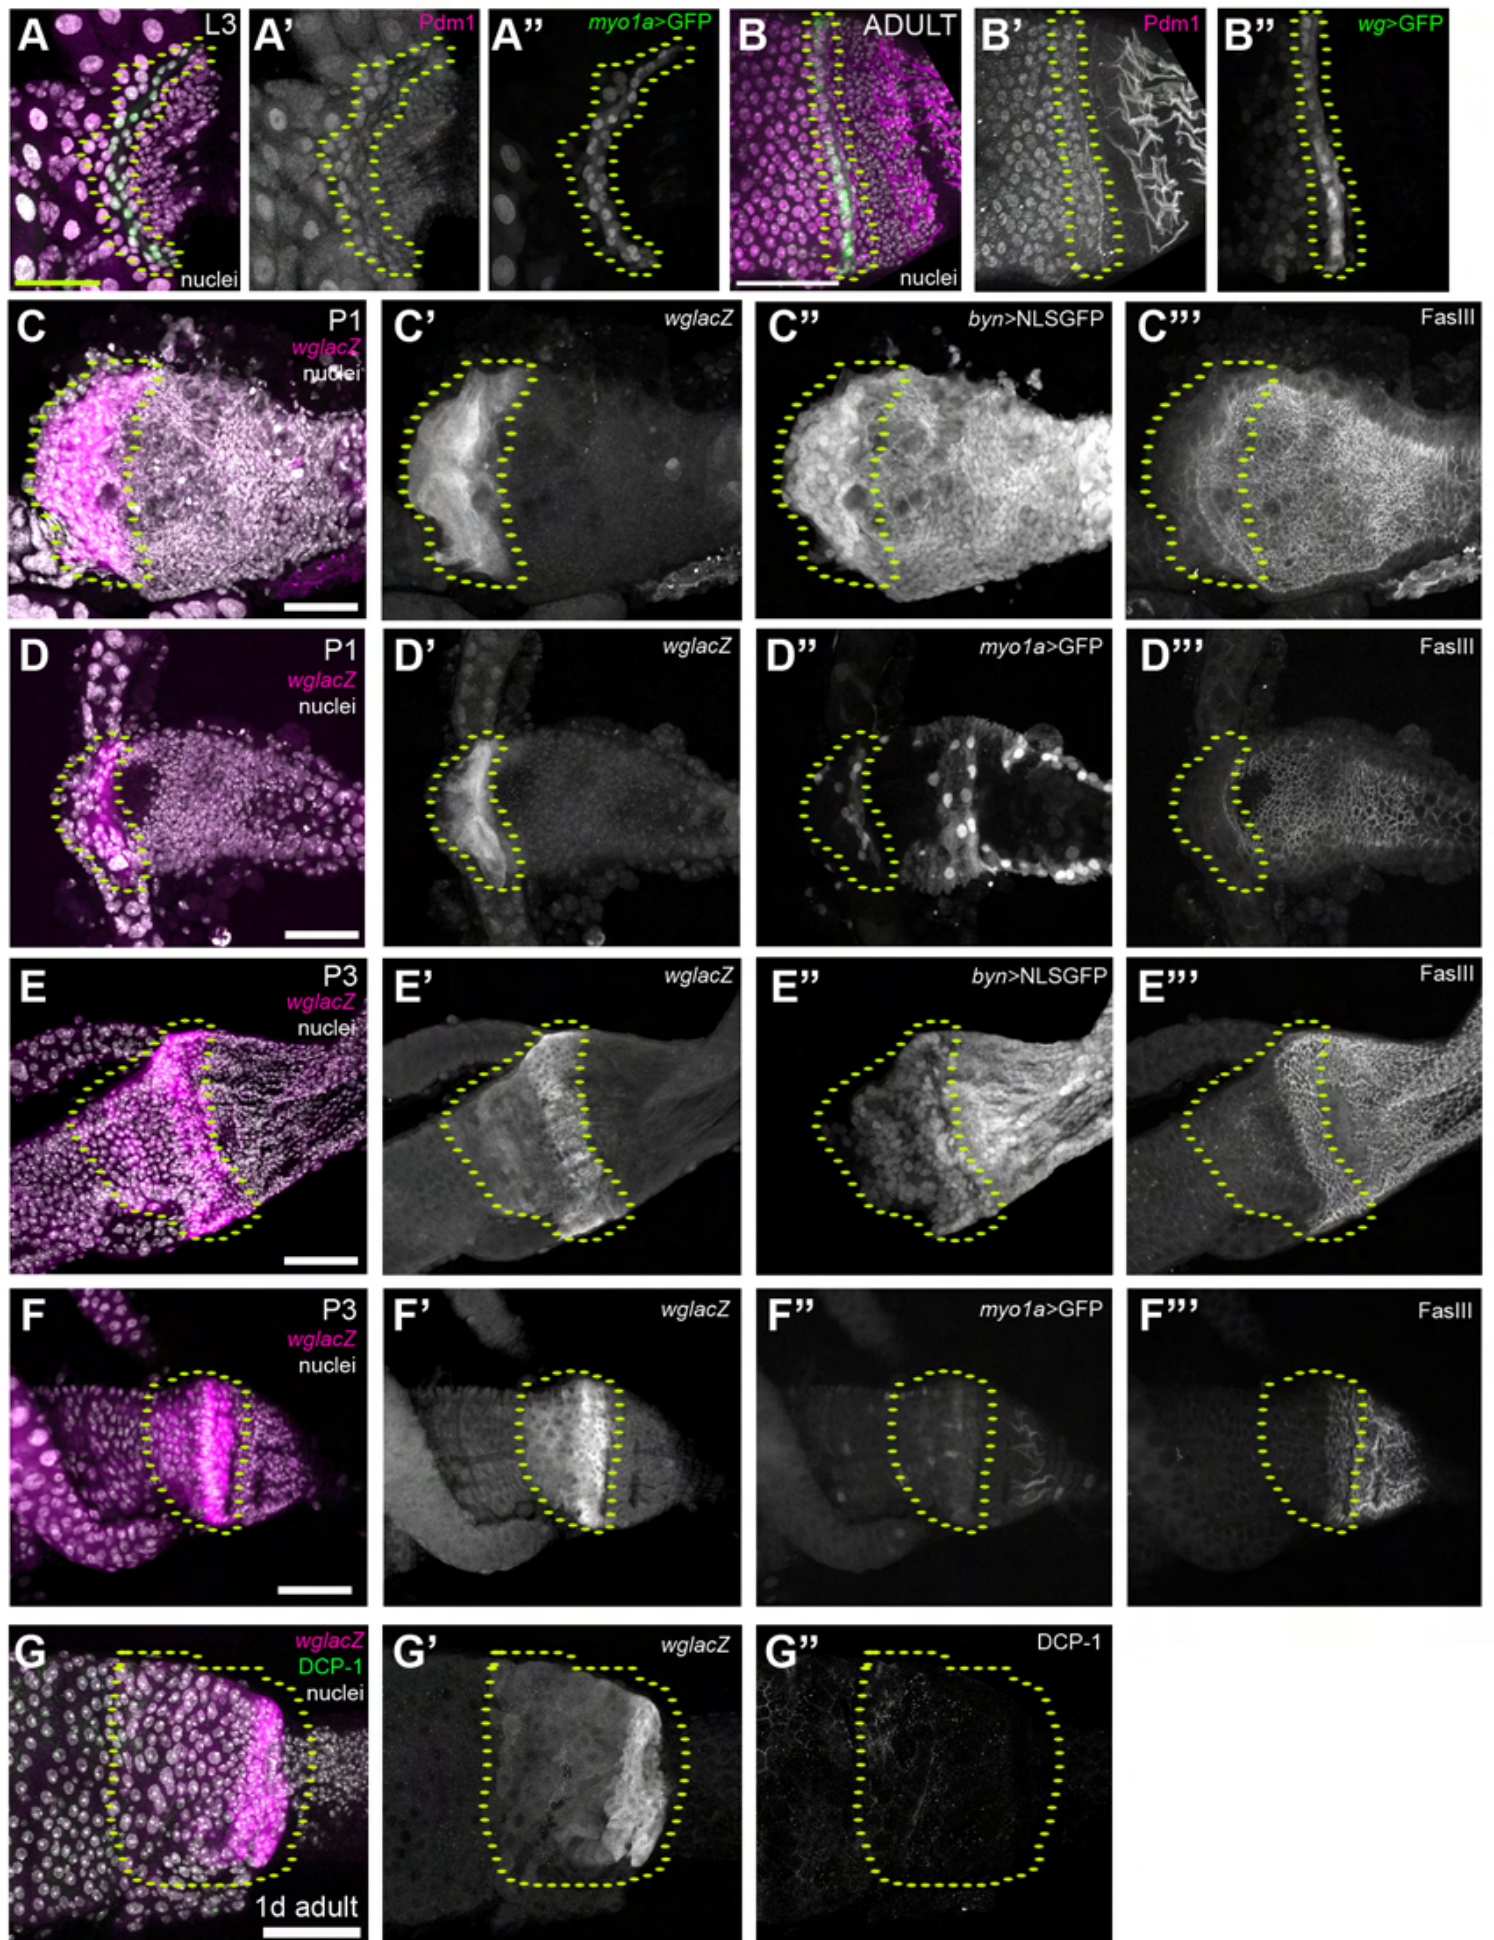

# SupplFig2

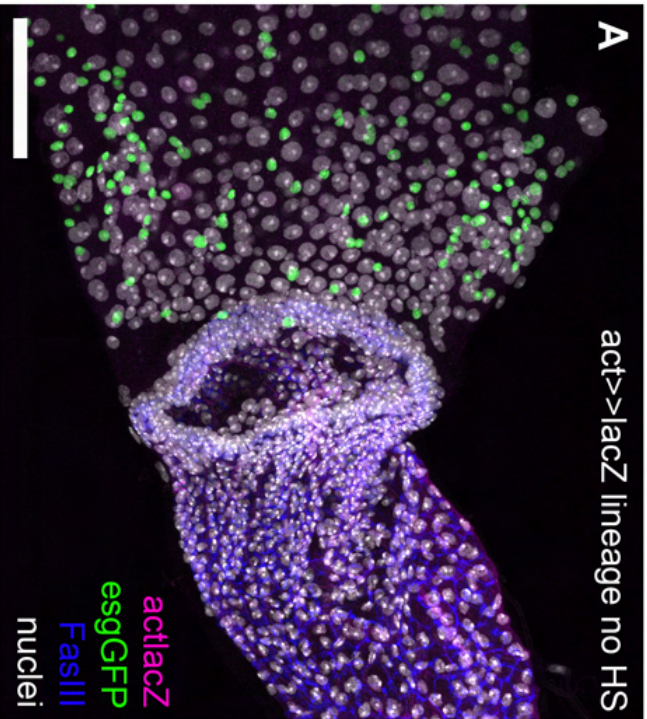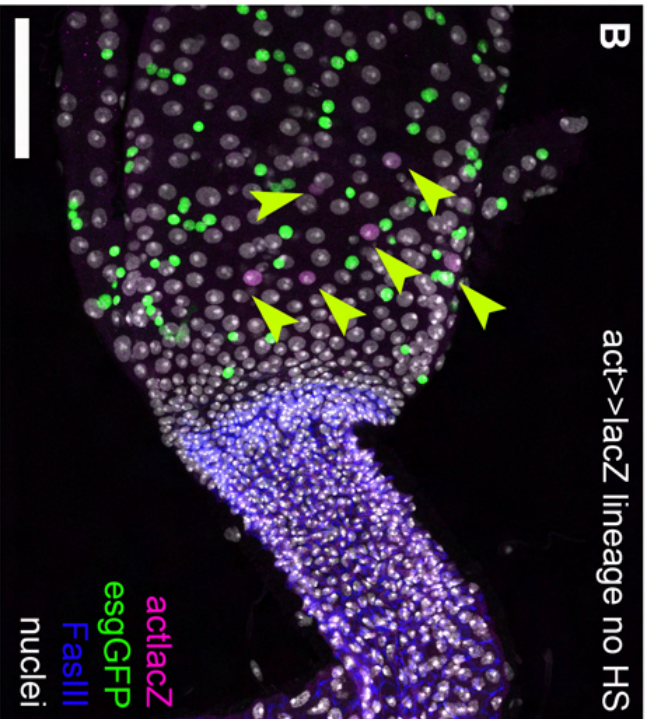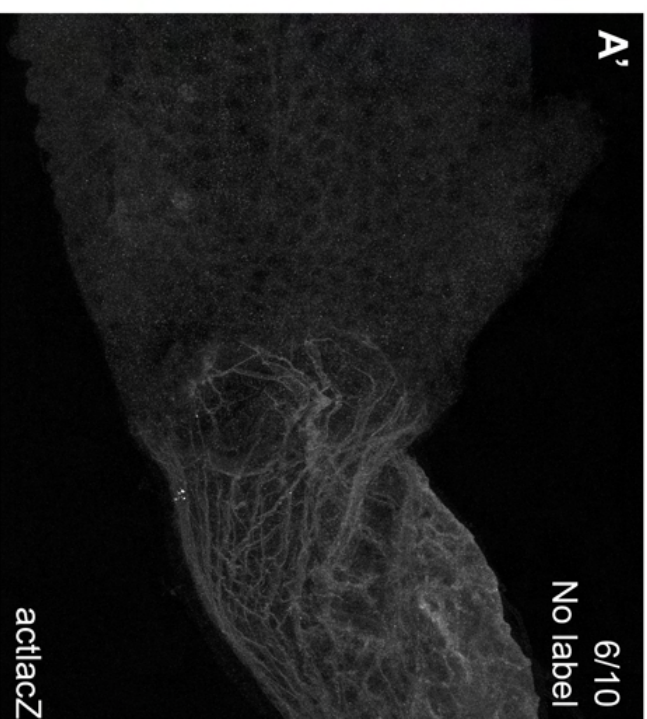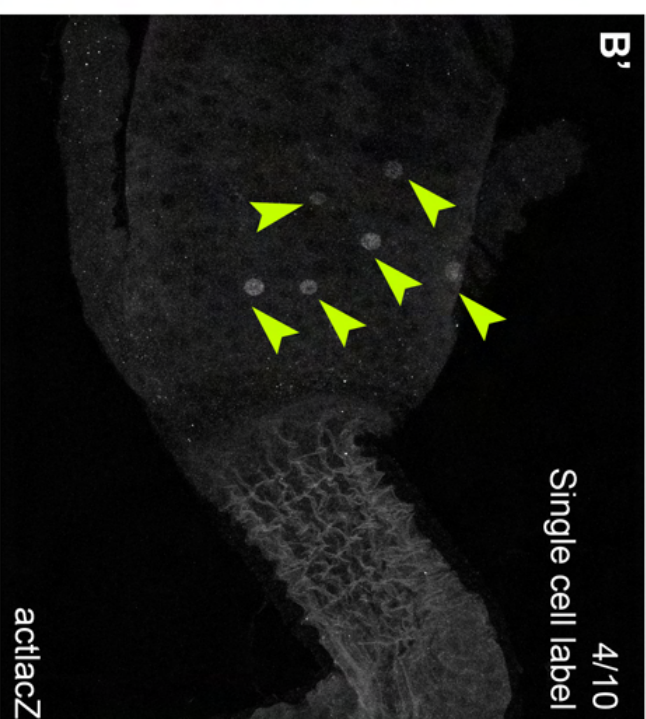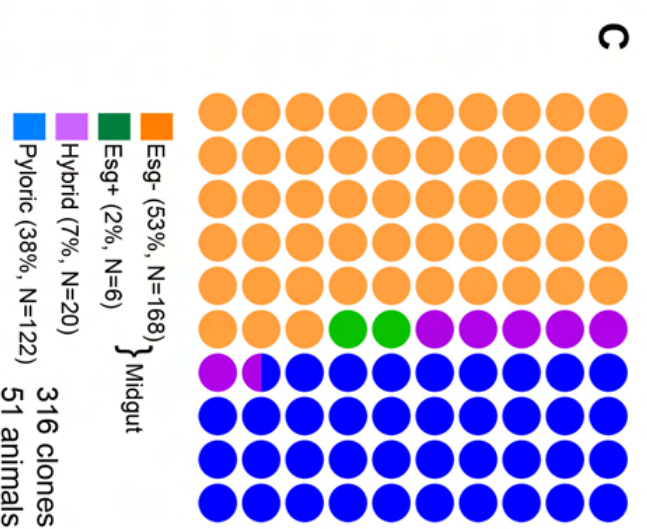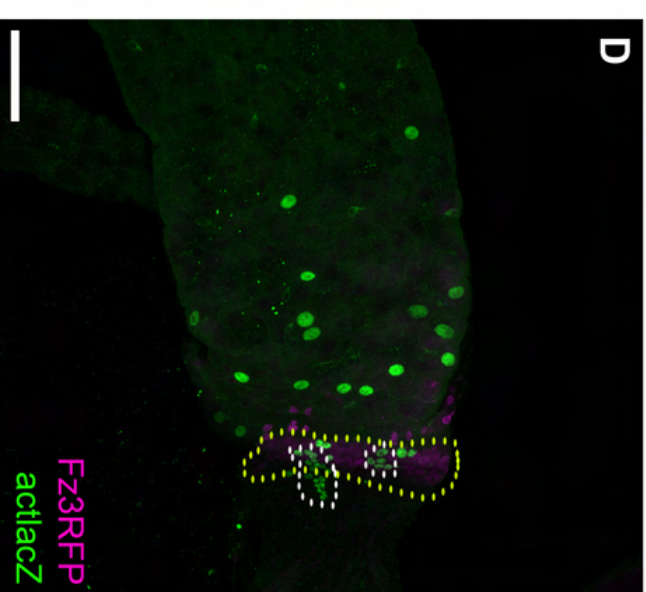

# SupplFig3

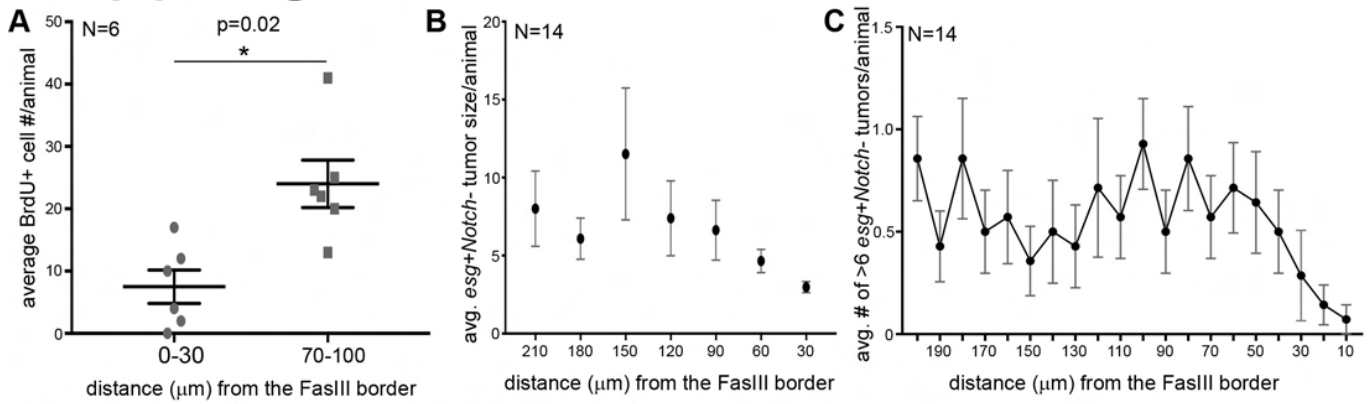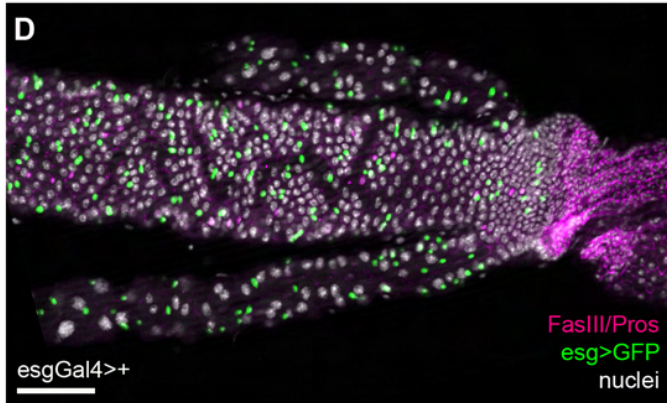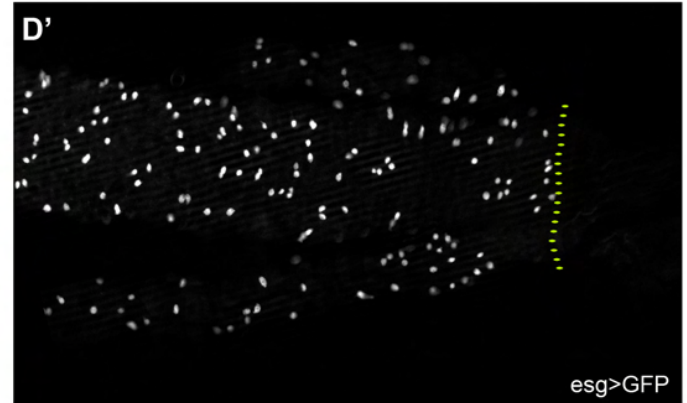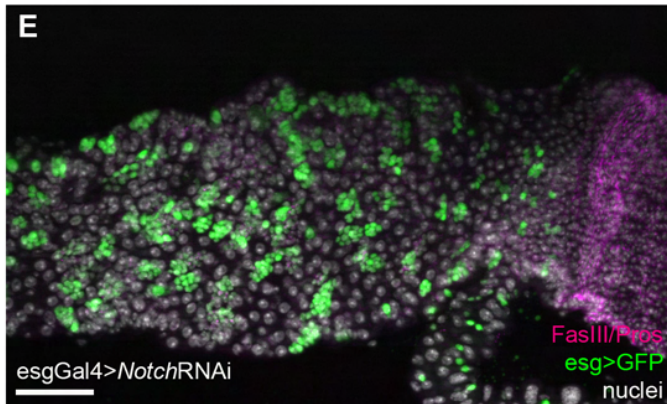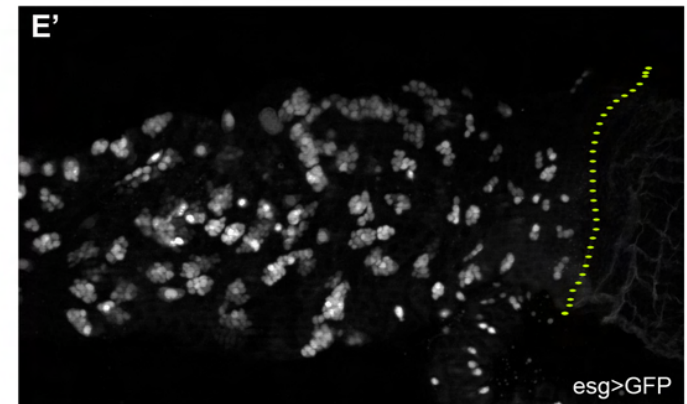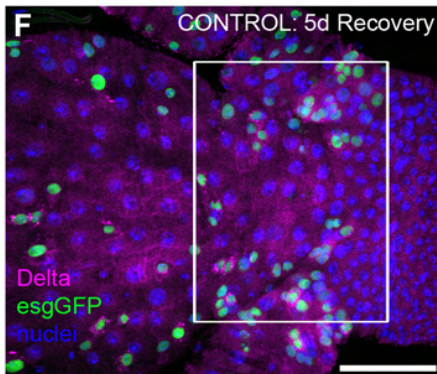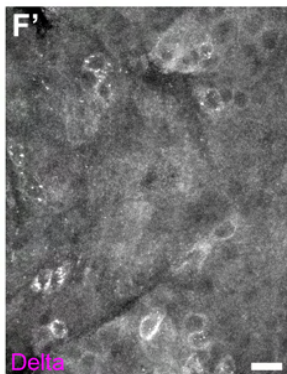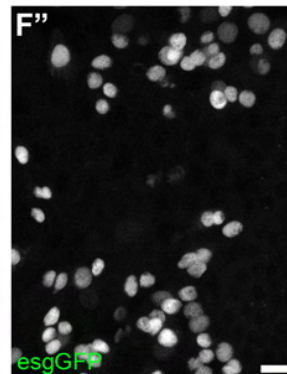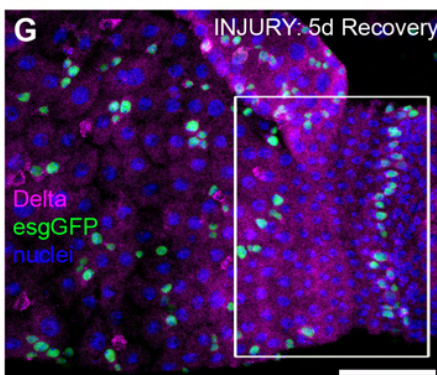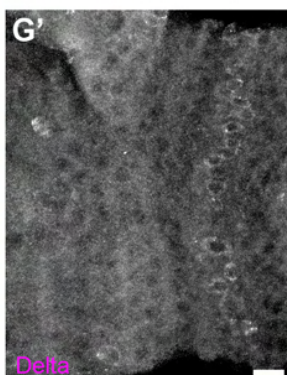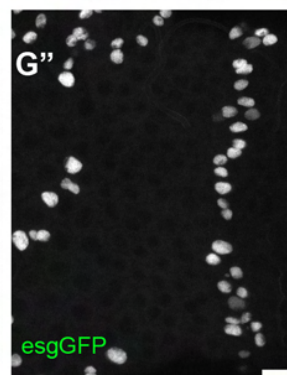

# SupplFig4

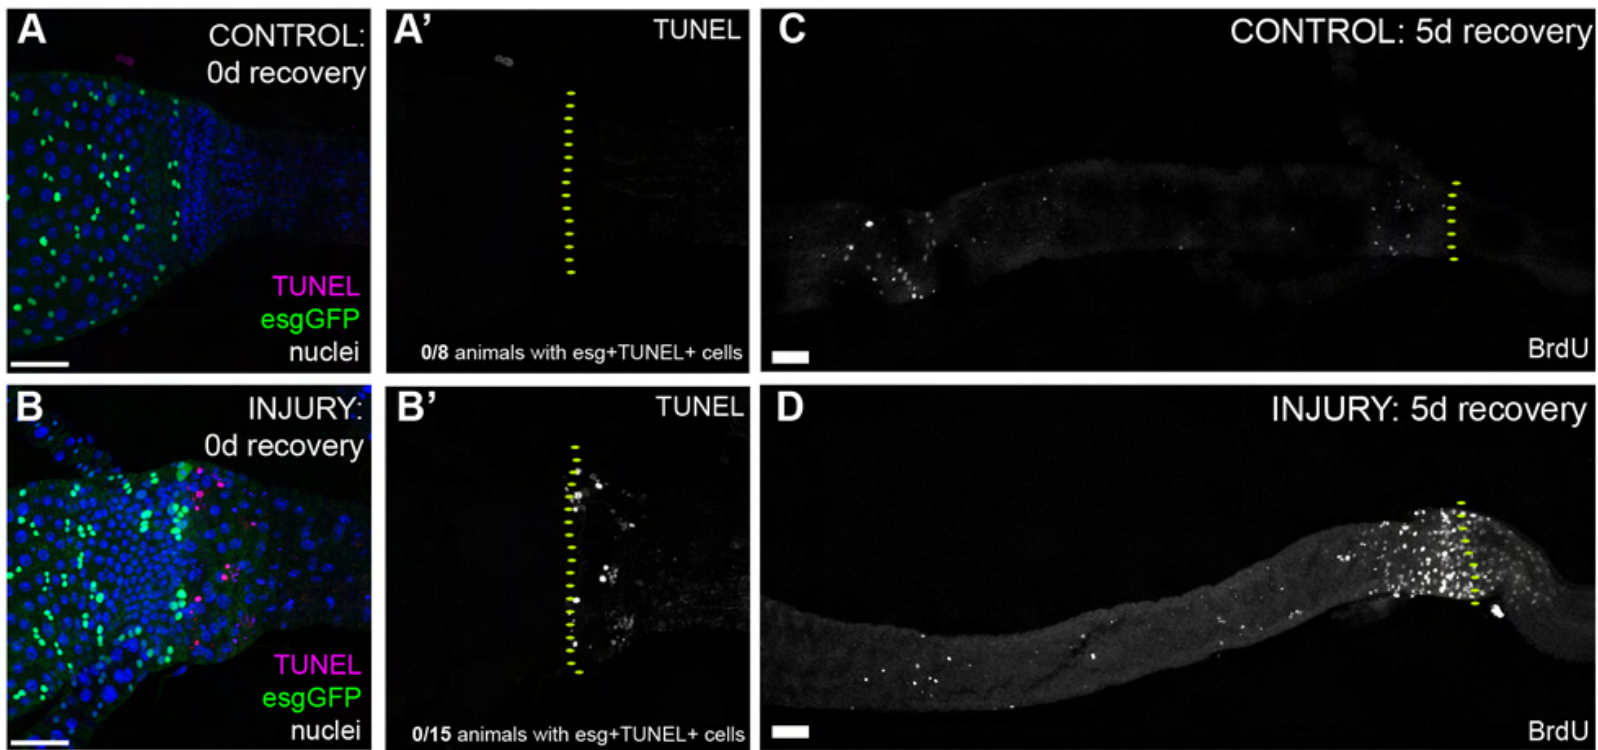

# SupplFig5

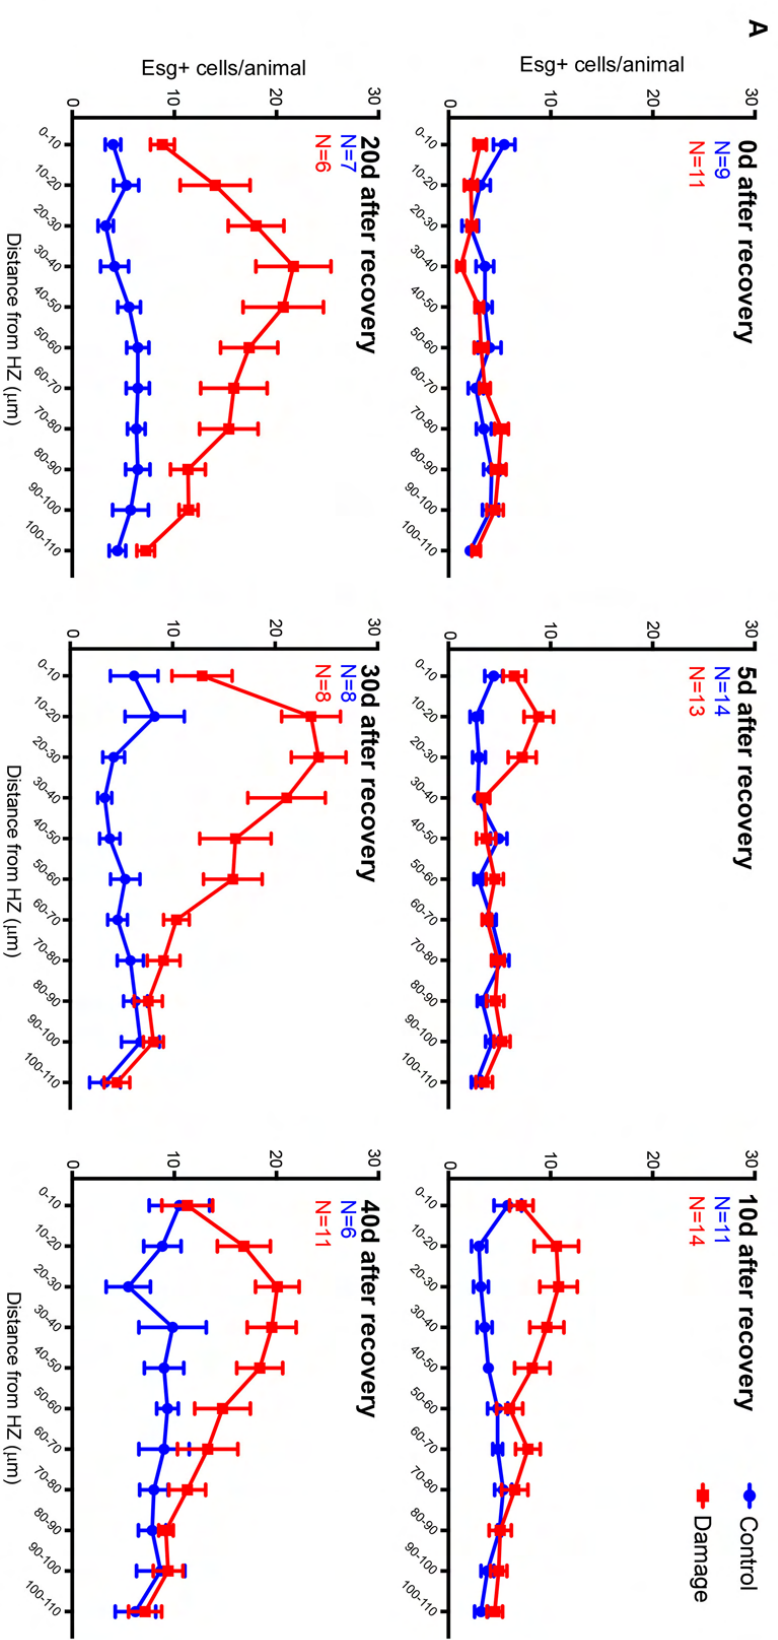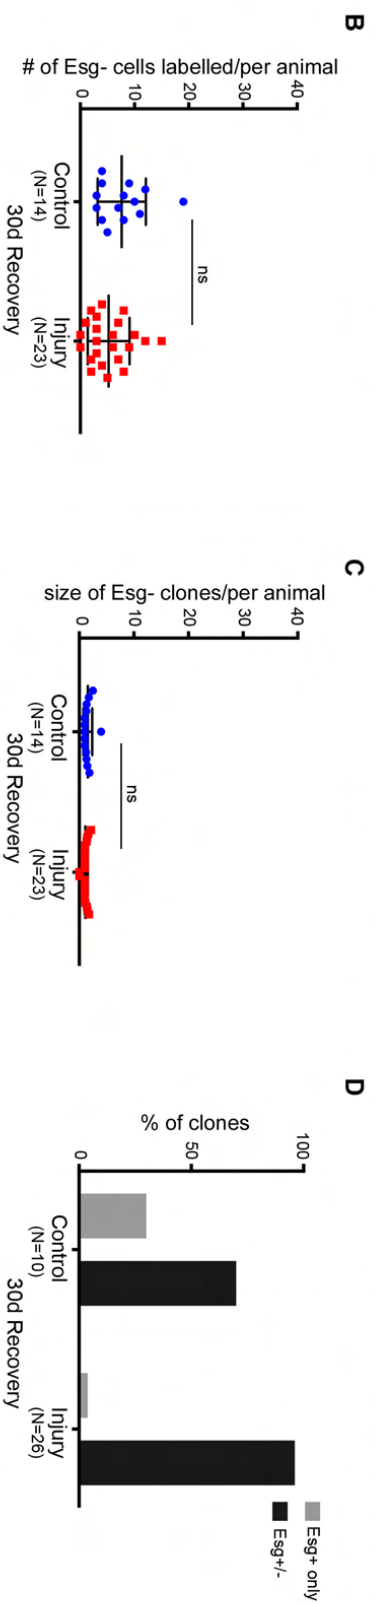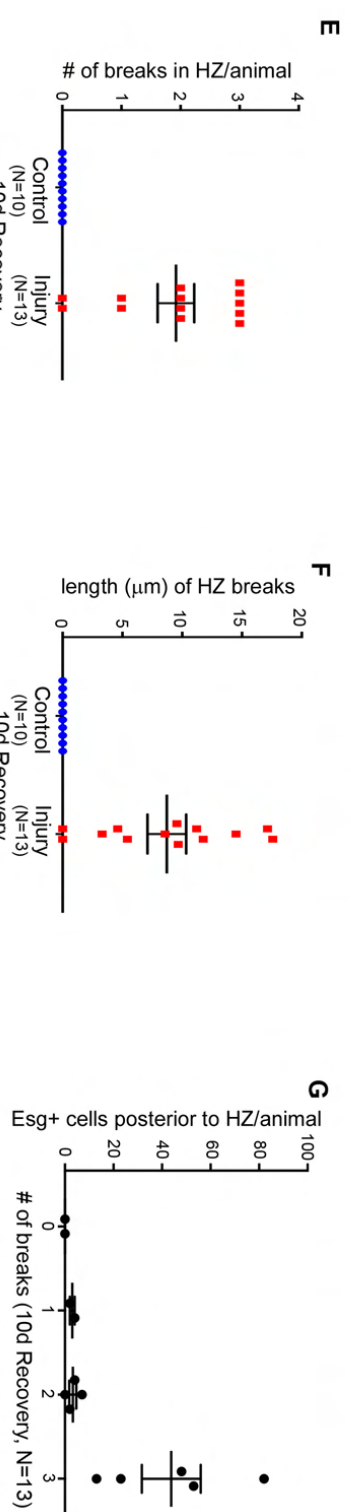

# SupplFig6

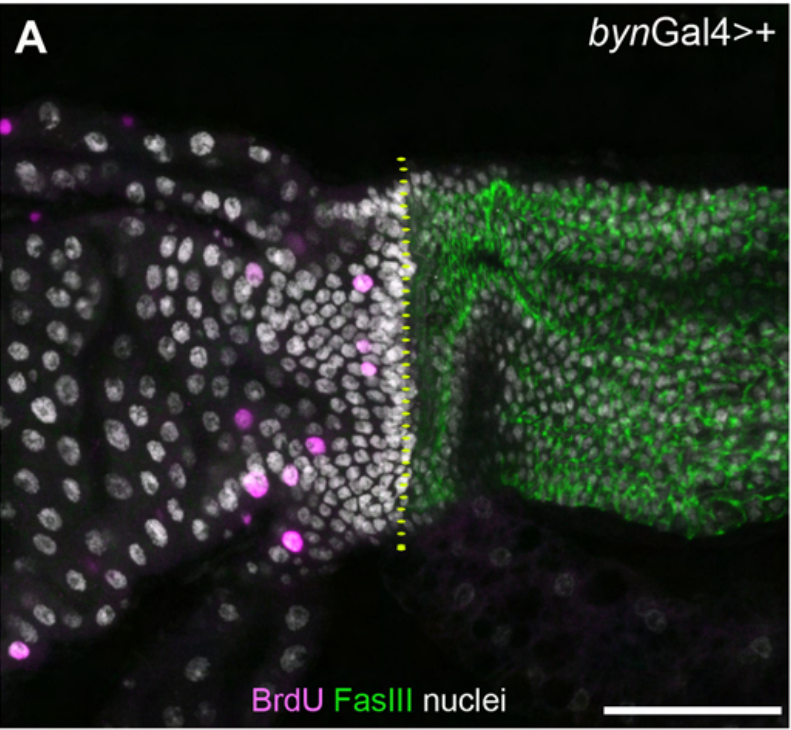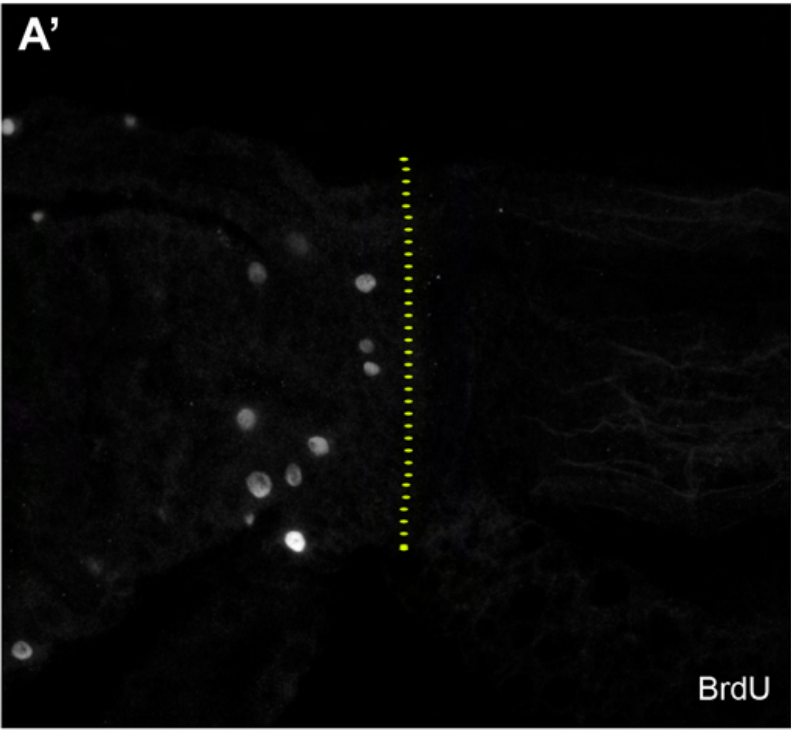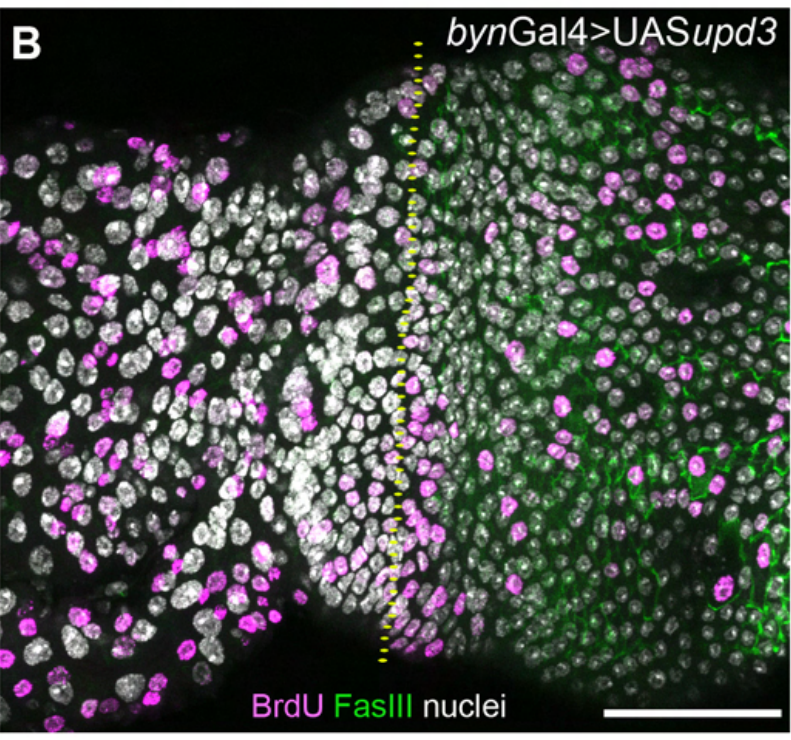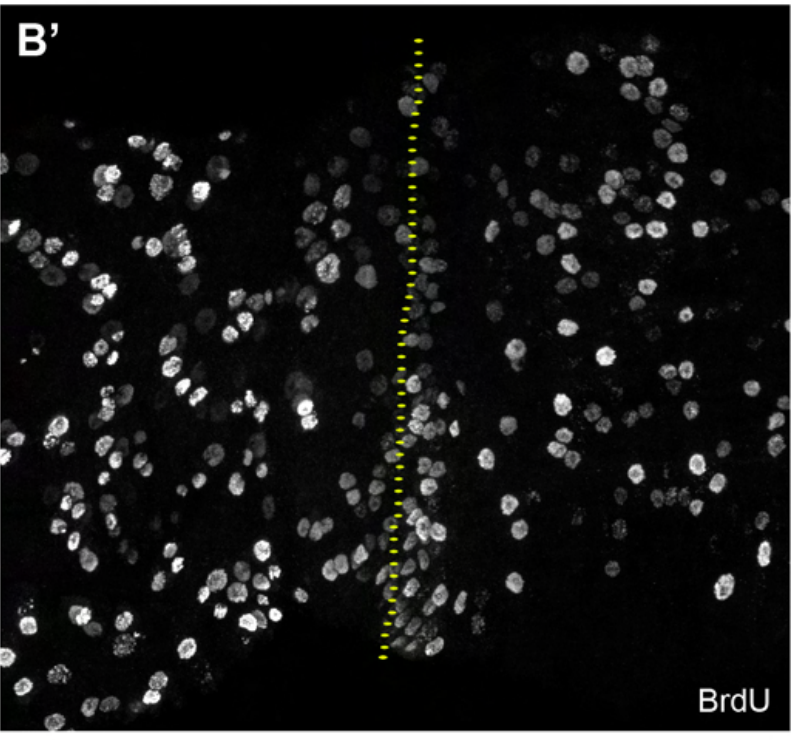

Supplement: 152074-1.pdf [file 152074-1.pdf]
